# Supplementary material for: Identification of peptide epitopes of the gp120 protein of HIV-1 capable of inducing cellular and humoral immunity
Source: Royal Society of Chemistry journal article supplement (doi:10.1039/d2ra08160a), 2023-01-01
Supplement: d2ra08160a1.pdf [file d2ra08160a1.pdf]

## Supporting Information

Theoretical and experimental analysis in search of new immunogenic peptides from gp120 protein of HIV-1.

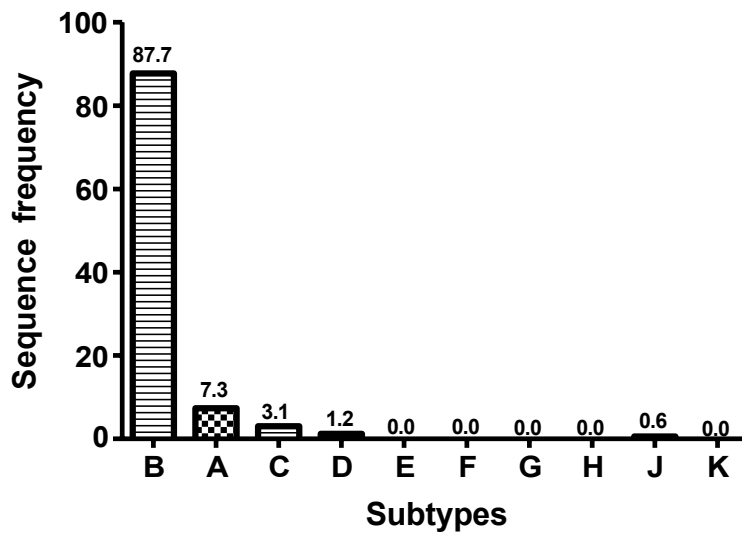

**Figure S1.** Frequency of sequences obtained by each subtype of HIV-1 found at NCBI in 2015.

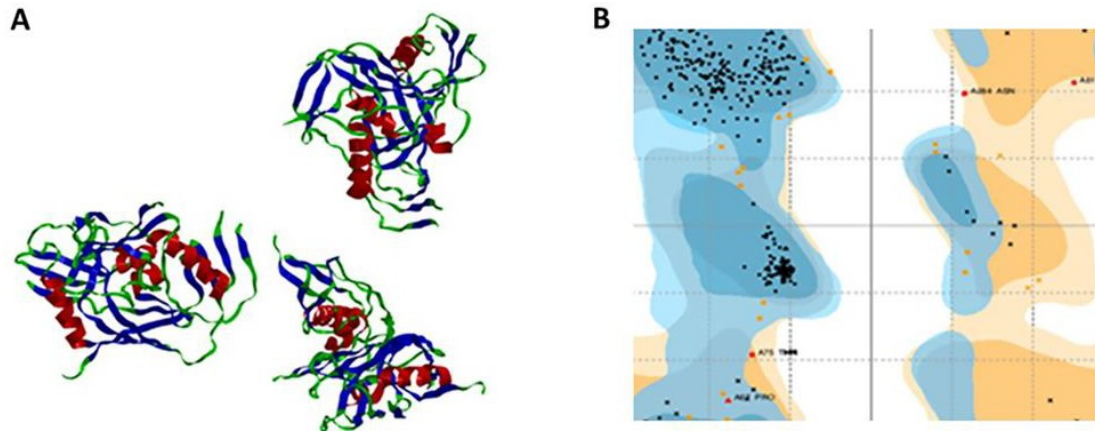

**Figure S2.** A. 3D structure of the HIV-1 gp120 trimer. B. Ramachandran's plot of gp120 protein.

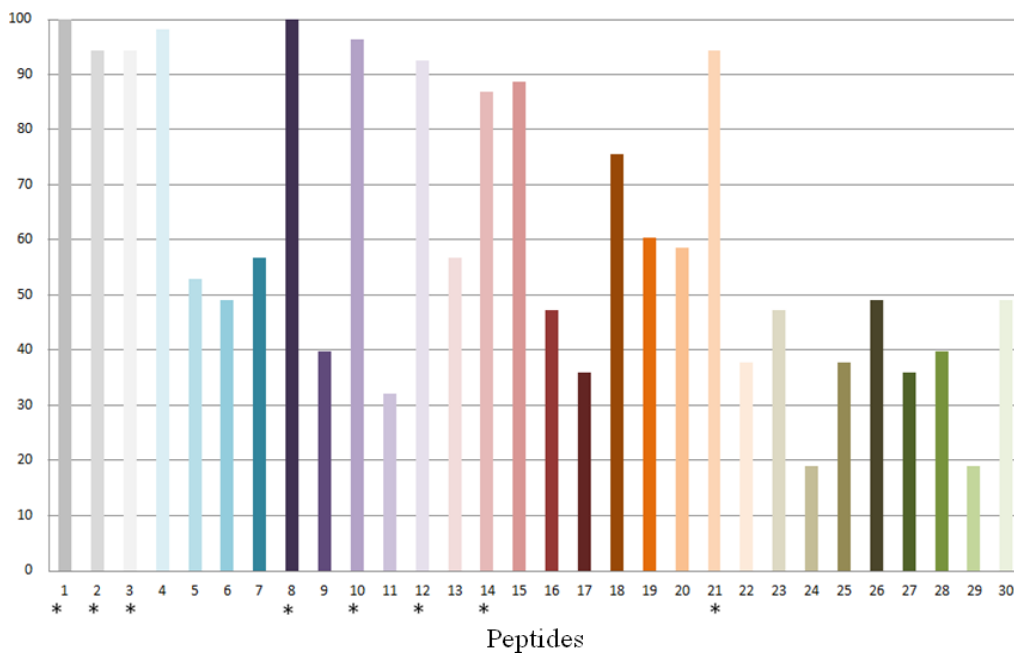

**Figure S3.** Frequency of the epitopes in the different alleles of the CMH-II predicted by the *ProPred* server. \* Asterisks in the graph indicate the peptides that by their structure and the score obtained in the servers are potential candidates for their synthesis.

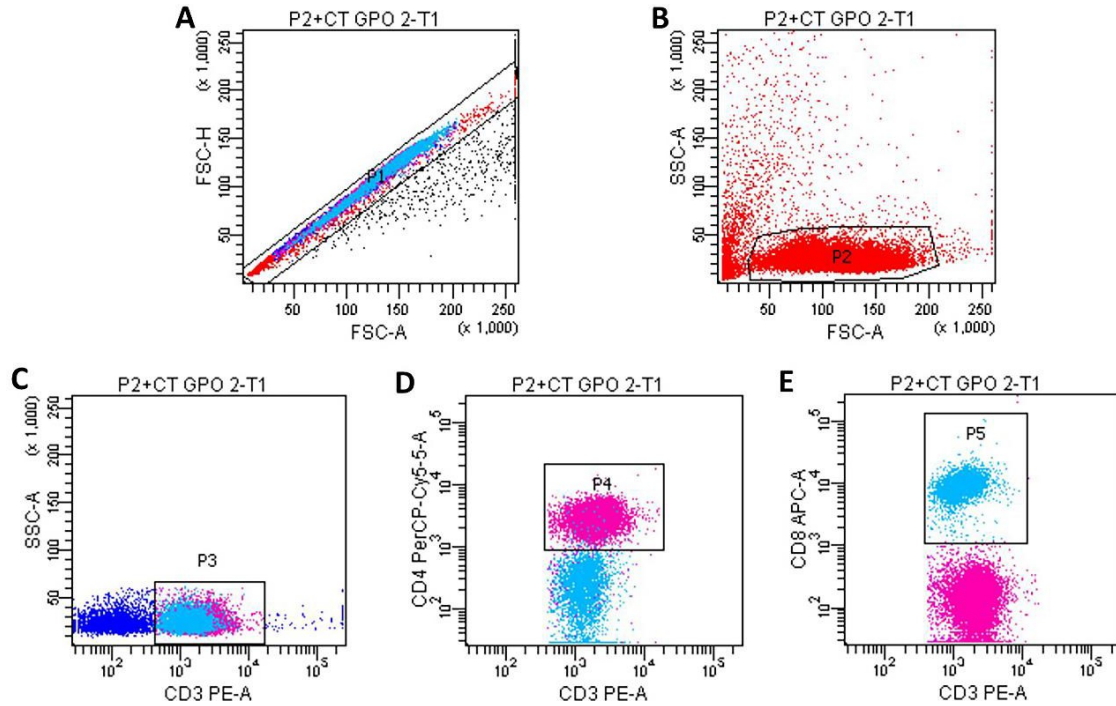

**Figure S4. Flow Cytometry Dot-Plots.** Representative Dot-Plots for selection criteria of cell populations for the P2+CT from IN group, cells were gated based on size and granularity using FSC-A and SSC-A. Dot-Plots: A: FSC-A and FSC-H; B: FSC-A and SSC-A; C: CD3 and SSC-A; D: CD3 and CD4; E: CD3 and CD8. Programs to determinate lymphocyte region; the same procedure was applied to all mice groups.

**Table S1.** Proteasomal cleavages predicted by the *PaPROC* server

| Peptide | Proteasomal cleavages Type-I                                                 |
|---------|------------------------------------------------------------------------------|
| P31     | MTLTVQA RQLL SGI V QQ Q S NL L RAIEA Q Q H MLQL T VWGI KQL QA RVLALERYL KDQQ |
| P32     | FNVTTNM   RDKV   QG   A   YAL   F   Y   K  LD   VVPI                         |
| P37     | LTVWGI   KQLQA                                                               |
| Peptide | Proteasomal cleavages Type-II                                                |
| P31     | MTLTVQ A RQLLSGIVQQ QSNLL RAIEAQQH ML QL T VWGI KQL QA RVLALER Y L KDQQ      |
| P32     | FNVTTNM   RDKVQGA   YAL   FY   K  LDVVPI                                     |
| P37     | LTVWGI   KQLQA                                                               |
| P40     | MTLTVQ   ARQL                                                                |
| Peptide | Proteasomal cleavages Type-II                                                |
| P31     | MTLTVQ A RQL LSGIVQQS NL L RAIEAQQ H ML QL TV WGI KQL QA RVLAL ER Y L KDQQ   |
| P32     | FNVTTNM   RDKV   QGA   YAL   FY   K  L   D   VVPI                            |
| P37     | LTVWGI   KQLQA                                                               |
| P40     | MTLTVQ   ARQL                                                                |

**Table S2.** Molecular, topological and chemical reactivity parameters calculated by the DFT method with a 6-311G\*\* used to develop the QSAR models.

| Peptides |            | Descriptors |         |        |       |                  |       |      |
|----------|------------|-------------|---------|--------|-------|------------------|-------|------|
| No.      | Secuencias | Hy          | AMR     | ALOGP  | ICR   | Q <sub>tot</sub> | EHOMO | I    |
| P2       | FYKLDVVPI  | 7.776       | 285.854 | 3.308  | 3.968 | 17.844           | -8.37 | 8.37 |
| P6       | IRPVVSTQL  | 7.576       | 204.841 | -1.86  | 3.848 | 13.468           | -9.07 | 9.07 |
| P10      | LGFLSAAGS  | 8.743       | 267.271 | 1.108  | 4.032 | 18.202           | -8.57 | 8.57 |
| P16      | YKLDVVPID  | 16.755      | 277.179 | -5.496 | 3.974 | 19.562           | -7.8  | 7.8  |
| P30      | FNSTWTRND  | 11.574      | 254.704 | -1.643 | 3.902 | 16.484           | -9.4  | 9.4  |

$E_{HOMO}$  = Energy of the HOMO orbital;  $Q_{tot}$  = total absolute charge;  $AlogP$  = Ghose-Crippen octanol-water partition coefficient;  $AMR$  = Molar refractivity;  $ICR$  = radial centric information index;  $Hy$  = hydrophilic factor;  $I$  = Ionization potential.
